# Supplementary material for: A multi-breed GWAS for morphometric traits in four Beninese indigenous cattle breeds reveals loci associated with conformation, carcass and adaptive traits
Source: PubMed Central journal article supplement (PMC7656759; doi:10.1186/s12864-020-07170-0), 2020-11-11
Supplement: 12864_2020_7170_MOESM5_ESM.pdf [file 12864_2020_7170_MOESM5_ESM.pdf]

Additional file 5

**Table S4: Chromosome-wide significance thresholds used in multibreed GWAS for conformation traits in four Beninese indigenous cattle**

| <b>BTA</b>     | <b>SNP marker after QC</b> | <b>Effective number of independent SNP marker based on LD calculated using GEC</b> | <b>p-value threshold (pc)</b> |
|----------------|----------------------------|------------------------------------------------------------------------------------|-------------------------------|
| 1              | 2376                       | 2049.3                                                                             | 2.44E-05                      |
| 2              | 1893                       | 1654                                                                               | 3.02E-05                      |
| 3              | 1738                       | 1521.19                                                                            | 3.29E-05                      |
| 4              | 1710                       | 1520.59                                                                            | 3.29E-05                      |
| 5              | 1453                       | 1281.61                                                                            | 3.90E-05                      |
| 6              | 2156                       | 1764.76                                                                            | 2.83E-05                      |
| 7              | 1855                       | 1578.1                                                                             | 3.17E-05                      |
| 8              | 1635                       | 1433.32                                                                            | 3.49E-05                      |
| 9              | 1493                       | 1310.28                                                                            | 3.82E-05                      |
| 10             | 1654                       | 1411.28                                                                            | 3.54E-05                      |
| 11             | 1518                       | 1333.92                                                                            | 3.75E-05                      |
| 12             | 1163                       | 1043.83                                                                            | 4.79E-05                      |
| 13             | 1184                       | 1063.92                                                                            | 4.70E-05                      |
| 14             | 1200                       | 1070.96                                                                            | 4.67E-05                      |
| 15             | 1177                       | 1049.68                                                                            | 4.76E-05                      |
| 16             | 1199                       | 1058.1                                                                             | 4.73E-05                      |
| 17             | 1157                       | 1014.16                                                                            | 4.93E-05                      |
| 18             | 914                        | 824.35                                                                             | 6.07E-05                      |
| 19             | 984                        | 872.74                                                                             | 5.73E-05                      |
| 20             | 1154                       | 977.02                                                                             | 5.12E-05                      |
| 21             | 1022                       | 893.05                                                                             | 5.60E-05                      |
| 22             | 874                        | 786.52                                                                             | 6.36E-05                      |
| 23             | 855                        | 755.74                                                                             | 6.62E-05                      |
| 24             | 878                        | 776.26                                                                             | 6.44E-05                      |
| 25             | 647                        | 585.93                                                                             | 8.53E-05                      |
| 26             | 718                        | 648.8                                                                              | 7.71E-05                      |
| 27             | 693                        | 627.82                                                                             | 7.96E-05                      |
| 28             | 674                        | 617.25                                                                             | 8.10E-05                      |
| 29             | 746                        | 660.34                                                                             | 7.57E-05                      |
| <b>overall</b> | <b>36720</b>               | <b>32184.82</b>                                                                    | <b>1.55E-06</b>               |
